# Supplementary material
Source: PubMed Central journal article supplement (PMC5109239)
Supplement: EMBJ-35-2447-s001.pdf [file EMBJ-35-2447-s001.pdf]

# Appendix

## Contents

|                         |   |
|-------------------------|---|
| Appendix Figure S1..... | 2 |
| Appendix Figure S2..... | 3 |

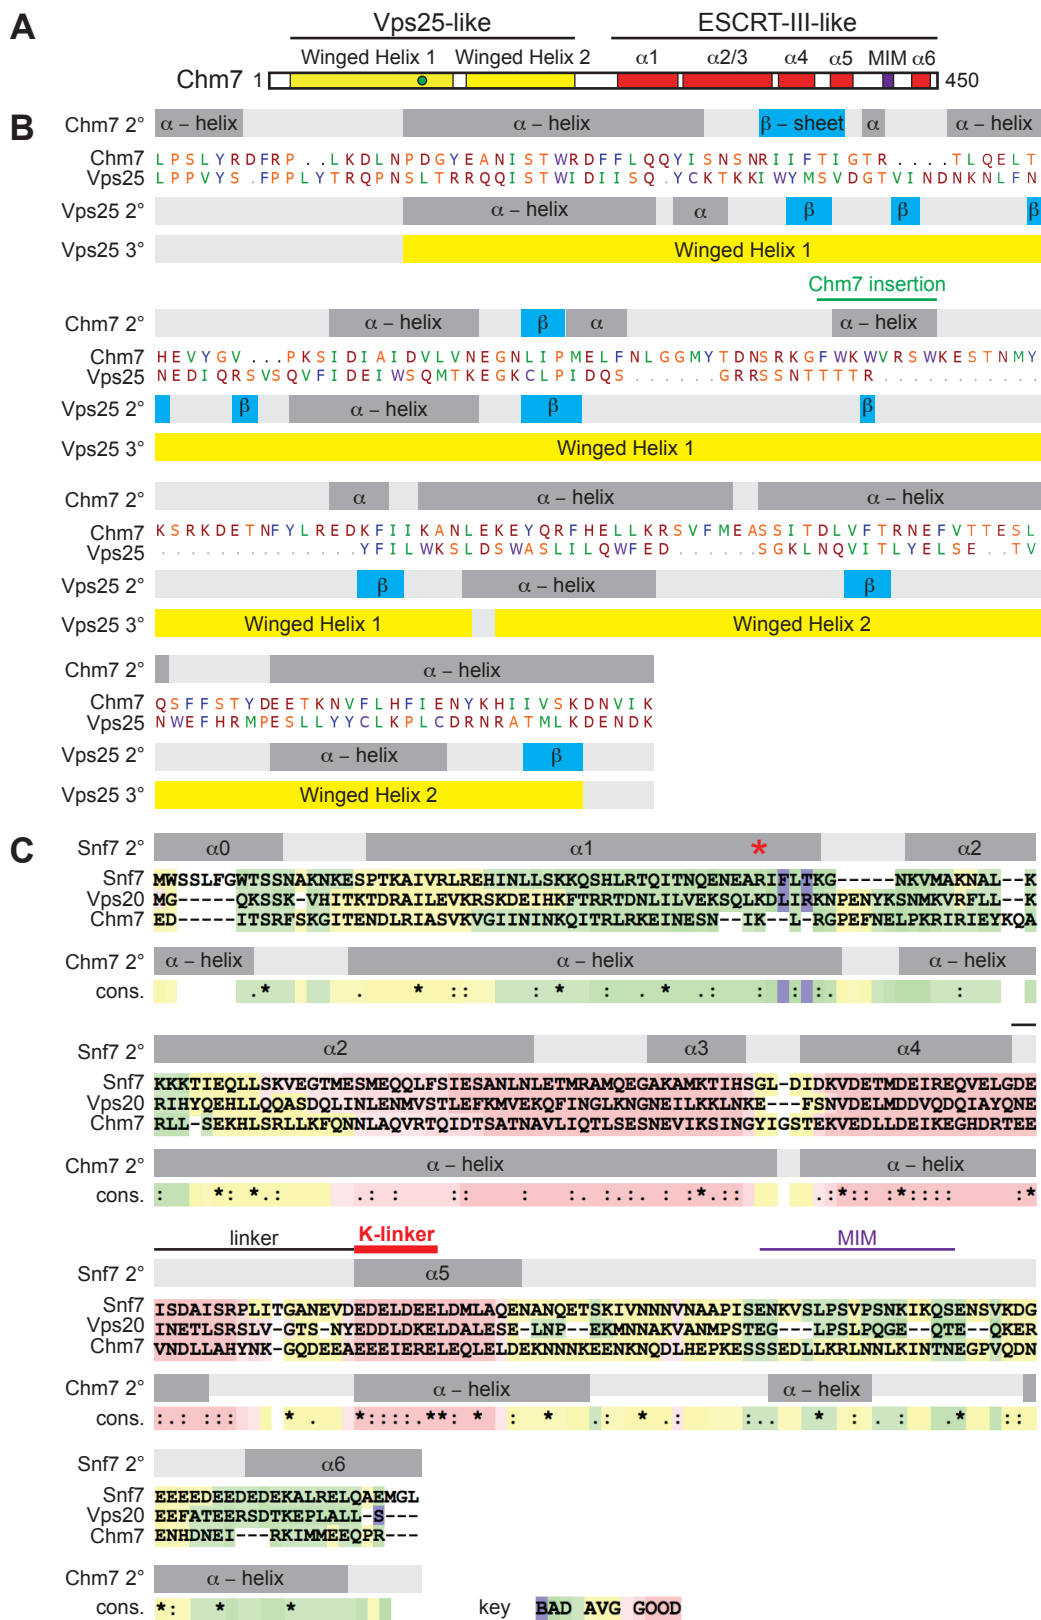

**Appendix Figure S1: Chm7 is a chimera of ESCRT-II and ESCRT-III proteins.**

**A** Schematic of the predicted domain architecture and structure of Chm7. Green circle represents a Chm7-specific insertion (relative to Vps25) predicted by Phyre2.

**B** Phyre2 generated alignment of the N-terminal domain of Chm7 (amino acids 10-214) and Vps25 (amino acids 4-195) with predicted secondary (2°) and tertiary (3°) structure. Alpha helices are gray; β-sheets are blue, winged helix domains are yellow.

**C** T-Coffee Expresso generated alignment of the C-terminal domain of Chm7 (aa221-450) with Snf7 and Vps20. Coloration reflects the conservation score depicted in key at bottom. The Chm7 2° structural prediction was generated using Phyre2. Alpha helices are gray, red asterisk denotes a key residue for the intramolecular contact with alpha helix 5 and K-linker, K-linker is marked by red line, MIM domains marked by purple line.

## Appendix Figure S2

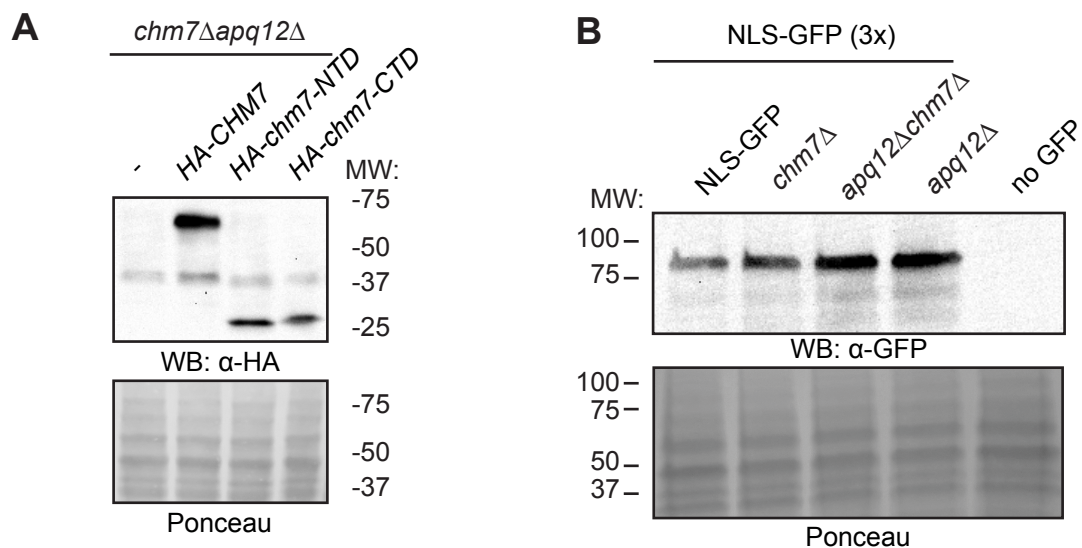

### Appendix Figure S2:

**A** Western blot showing levels of indicated HA-fusion proteins used for complementation analysis in Figure 1E.

**B** Western blot of NLS-GFP in the indicated strains with ponceau-stained nitrocellulose membrane to show relative protein loads.
